# Supplementary material
Source: MDPI journal article supplement (https://www.mdpi.com/2073-4395/13/8/2172)
Supplement: s1 [file s1]

# Analysis of the scale effect and temporal stability of groundwater in a large irrigation district in Northwest China

Ziyi Zan <sup>1</sup>, Weifeng Yue <sup>1,\*</sup>, Hangzheng Zhao <sup>1</sup>, Changming Cao <sup>1</sup>, Fengyan Wu <sup>2</sup>, Peirong Lin <sup>2</sup> and Jin Wu <sup>3</sup>

<sup>1</sup> College of Water Sciences, Beijing Normal University, Beijing 100875, China;

<sup>2</sup> Hubei Water Resources and Hydropower Science and Technology Promotion Center, Hubei Water Resources Research Institute, Wuhan 430070, China;

<sup>3</sup> Faculty of Architecture, Civil and Transportation Engineering, Beijing University of Technology, Beijing 100124, China;

\* Correspondence: yuewf@bnu.edu.cn (W.Y.)

## Supplementary Materials

Table S1. Statistical characteristic value of Hetao Irrigation District from 1991 to 2015.

Table S2. Statistical characteristic value of Yichang Irrigation Subdistrict from 1991 to 2015.

Table S3. Statistical characteristic value of Yihe Main Canal from 1991 to 2015.

Table S4. Statistical characteristic value of Branch Canal from 1991 to 2015.

**Table S1.** Statistical characteristic value of Hetao Irrigation District from 1991 to 2015.

| Hetao Irrigation District |            |            |           |            |        |
|---------------------------|------------|------------|-----------|------------|--------|
| Date                      | Maximum(m) | Minimum(m) | Median(m) | Average(m) | CV(%)  |
| 1991                      | 3.06       | 0.85       | 1.65      | 1.709      | 21.70% |
| 1992                      | 2.95       | 0.85       | 1.68      | 1.7        | 23.20% |
| 1993                      | 3.51       | 0.69       | 1.64      | 1.676      | 24.40% |
| 1994                      | 3.36       | 0.73       | 1.58      | 1.622      | 25.50% |
| 1995                      | 3.32       | 0.69       | 1.54      | 1.566      | 25.40% |
| 1996                      | 3.03       | 0.68       | 1.56      | 1.604      | 25.40% |
| 1997                      | 2.60       | 0.73       | 1.60      | 1.618      | 23.20% |
| 1998                      | 2.66       | 0.73       | 1.66      | 1.682      | 23.90% |
| 1999                      | 2.93       | 0.72       | 1.79      | 1.805      | 24.70% |
| 2000                      | 3.26       | 0.79       | 1.81      | 1.836      | 25.50% |
| 2001                      | 3.92       | 0.70       | 1.73      | 1.786      | 25.80% |
| 2002                      | 3.77       | 0.88       | 1.70      | 1.767      | 27.80% |
| 2003                      | 4.01       | 0.90       | 1.80      | 1.889      | 28.10% |
| 2004                      | 4.03       | 0.66       | 1.67      | 1.831      | 32.60% |
| 2005                      | 4.20       | 0.89       | 1.82      | 1.962      | 31.30% |
| 2006                      | 5.71       | 0.77       | 1.79      | 1.972      | 36.90% |
| 2007                      | 6.07       | 0.74       | 1.65      | 1.838      | 41.80% |

|      |      |      |      |       |        |
|------|------|------|------|-------|--------|
| 2008 | 6.46 | 0.79 | 1.61 | 1.789 | 42.90% |
| 2009 | 7.22 | 0.79 | 1.71 | 1.898 | 43.10% |
| 2010 | 7.57 | 0.86 | 1.80 | 1.981 | 44.90% |
| 2011 | 8.01 | 0.84 | 1.85 | 2.104 | 45.40% |
| 2012 | 7.73 | 0.75 | 1.70 | 1.906 | 49.30% |
| 2013 | 8.10 | 0.69 | 1.78 | 1.988 | 47.70% |
| 2014 | 8.52 | 0.53 | 1.85 | 2.027 | 50.00% |
| 2015 | 8.67 | 0.36 | 1.94 | 2.144 | 49.60% |

**Table S2.** Statistical characteristic value of Yichang Irrigation Subdistrict from 1991 to 2015.

| Yichang Irrigation Subdistrict |            |            |           |            |        |
|--------------------------------|------------|------------|-----------|------------|--------|
| Date                           | Maximum(m) | Minimum(m) | Median(m) | Average(m) | CV(%)  |
| 1991                           | 2.43       | 0.85       | 1.60      | 1.657      | 22.20% |
| 1992                           | 2.95       | 0.85       | 1.62      | 1.641      | 25.00% |
| 1993                           | 2.41       | 0.86       | 1.59      | 1.608      | 23.60% |
| 1994                           | 2.41       | 0.75       | 1.54      | 1.582      | 26.10% |
| 1995                           | 2.47       | 0.81       | 1.47      | 1.525      | 25.70% |
| 1996                           | 2.45       | 0.89       | 1.59      | 1.628      | 22.60% |
| 1997                           | 2.59       | 0.97       | 1.60      | 1.624      | 22.60% |
| 1998                           | 2.58       | 0.90       | 1.70      | 1.708      | 23.90% |
| 1999                           | 2.79       | 0.72       | 1.78      | 1.79       | 26.70% |
| 2000                           | 2.81       | 0.88       | 1.80      | 1.84       | 24.70% |
| 2001                           | 3.92       | 0.97       | 1.76      | 1.814      | 25.90% |
| 2002                           | 3.77       | 1.02       | 1.80      | 1.813      | 24.90% |
| 2003                           | 4.01       | 1.10       | 1.81      | 1.878      | 26.90% |
| 2004                           | 4.03       | 0.99       | 1.63      | 1.769      | 31.00% |
| 2005                           | 4.17       | 1.07       | 1.81      | 1.915      | 29.40% |
| 2006                           | 4.42       | 1.03       | 1.79      | 1.94       | 32.50% |
| 2007                           | 4.40       | 0.98       | 1.61      | 1.764      | 36.70% |
| 2008                           | 4.09       | 0.87       | 1.48      | 1.626      | 38.80% |
| 2009                           | 3.90       | 0.98       | 1.64      | 1.788      | 31.70% |
| 2010                           | 4.14       | 0.97       | 1.73      | 1.883      | 31.50% |
| 2011                           | 4.39       | 1.10       | 1.84      | 2.004      | 31.20% |
| 2012                           | 4.17       | 0.98       | 1.64      | 1.801      | 33.20% |
| 2013                           | 4.19       | 0.95       | 1.75      | 1.879      | 32.20% |
| 2014                           | 4.68       | 0.53       | 1.84      | 1.946      | 34.20% |
| 2015                           | 5.01       | 0.45       | 1.97      | 2.102      | 36.50% |

**Table S3.** Statistical characteristic value of Yihe Main Canal from 1991 to 2015.

| Yihe Main Canal |            |            |           |            |        |
|-----------------|------------|------------|-----------|------------|--------|
| Date            | Maximum(m) | Minimum(m) | Median(m) | Average(m) | CV(%)  |
| 1991            | 2.17       | 1.09       | 1.44      | 1.497      | 20.40% |

|      |      |      |      |       |        |
|------|------|------|------|-------|--------|
| 1992 | 1.99 | 1.16 | 1.48 | 1.495 | 18.80% |
| 1993 | 1.92 | 1.11 | 1.52 | 1.451 | 20.20% |
| 1994 | 2.17 | 1.11 | 1.44 | 1.477 | 21.60% |
| 1995 | 2.00 | 1.05 | 1.41 | 1.441 | 17.50% |
| 1996 | 1.96 | 1.21 | 1.47 | 1.481 | 16.20% |
| 1997 | 2.06 | 1.13 | 1.59 | 1.556 | 18.80% |
| 1998 | 2.35 | 1.16 | 1.55 | 1.636 | 19.60% |
| 1999 | 2.49 | 1.13 | 1.72 | 1.727 | 18.30% |
| 2000 | 2.57 | 1.03 | 1.81 | 1.876 | 19.70% |
| 2001 | 2.48 | 1.37 | 1.69 | 1.957 | 33.20% |
| 2002 | 2.44 | 1.22 | 1.77 | 1.943 | 31.50% |
| 2003 | 2.42 | 1.17 | 1.79 | 1.948 | 34.50% |
| 2004 | 2.30 | 1.05 | 1.64 | 1.868 | 37.40% |
| 2005 | 2.67 | 1.23 | 1.95 | 2.083 | 33.80% |
| 2006 | 2.96 | 1.12 | 1.98 | 2.151 | 38.30% |
| 2007 | 2.92 | 1.08 | 1.77 | 2.02  | 42.90% |
| 2008 | 2.67 | 1.04 | 1.57 | 1.779 | 44.60% |
| 2009 | 2.56 | 1.16 | 1.83 | 1.949 | 34.90% |
| 2010 | 2.88 | 1.12 | 1.84 | 2.041 | 35.50% |
| 2011 | 2.81 | 1.23 | 1.89 | 2.125 | 34.70% |
| 2012 | 2.19 | 1.05 | 1.57 | 1.826 | 39.50% |
| 2013 | 2.34 | 1.25 | 1.82 | 1.898 | 37.60% |
| 2014 | 2.55 | 1.19 | 1.86 | 1.979 | 42.70% |
| 2015 | 2.89 | 0.99 | 1.84 | 2.115 | 45.30% |

**Table S4.** Statistical characteristic value of Branch Canal from 1991 to 2015.

| Date | Branch Canal |            |           |            |        |
|------|--------------|------------|-----------|------------|--------|
|      | Maximum(m)   | Minimum(m) | Median(m) | Average(m) | CV (%) |
| 1991 | 2.06         | 1.37       | 1.51      | 1.575      | 17.60% |
| 1992 | 1.89         | 1.21       | 1.49      | 1.518      | 17.40% |
| 1993 | 1.76         | 1.15       | 1.70      | 1.558      | 16.70% |
| 1994 | 1.88         | 1.41       | 1.44      | 1.548      | 12.80% |
| 1995 | 1.85         | 1.28       | 1.48      | 1.525      | 14.30% |
| 1996 | 1.82         | 1.26       | 1.62      | 1.552      | 17.60% |
| 1997 | 1.82         | 1.15       | 1.71      | 1.581      | 18.10% |
| 1998 | 2.05         | 1.42       | 1.72      | 1.752      | 15.90% |
| 1999 | 1.93         | 1.74       | 1.85      | 1.854      | 4.30%  |
| 2000 | 2.27         | 1.81       | 1.95      | 1.979      | 8.70%  |
| 2001 | 2.19         | 1.53       | 1.69      | 1.763      | 15.30% |
| 2002 | 2.06         | 1.46       | 1.66      | 1.74       | 13.60% |
| 2003 | 1.99         | 1.51       | 1.71      | 1.774      | 11.50% |
| 2004 | 2.14         | 1.50       | 2.00      | 1.844      | 17.10% |
| 2005 | 2.47         | 1.68       | 2.02      | 2.077      | 16.90% |
| 2006 | 2.84         | 1.80       | 2.11      | 2.261      | 21.40% |

|      |      |      |      |       |        |
|------|------|------|------|-------|--------|
| 2007 | 2.76 | 1.44 | 1.80 | 2.099 | 29.00% |
| 2008 | 2.67 | 1.39 | 1.82 | 1.865 | 28.20% |
| 2009 | 2.43 | 1.52 | 1.83 | 1.934 | 19.10% |
| 2010 | 2.77 | 1.64 | 2.16 | 2.098 | 22.10% |
| 2011 | 2.74 | 1.67 | 2.12 | 2.126 | 21.90% |
| 2012 | 2.12 | 1.37 | 1.59 | 1.723 | 18.40% |
| 2013 | 2.23 | 1.45 | 1.83 | 1.781 | 17.00% |
| 2014 | 2.08 | 1.19 | 1.94 | 1.745 | 22.50% |
| 2015 | 2.30 | 0.99 | 1.72 | 1.664 | 32.00% |

---
